# Supplementary material for: Nutritional stress reprograms dedifferention in glioblastoma multiforme driven by PTEN/Wnt/Hedgehog axis: a stochastic model of cancer stem cells
Source: PubMed Central journal article supplement (PMC6281623; doi:10.1038/s41420-018-0126-6), 2018-12-05

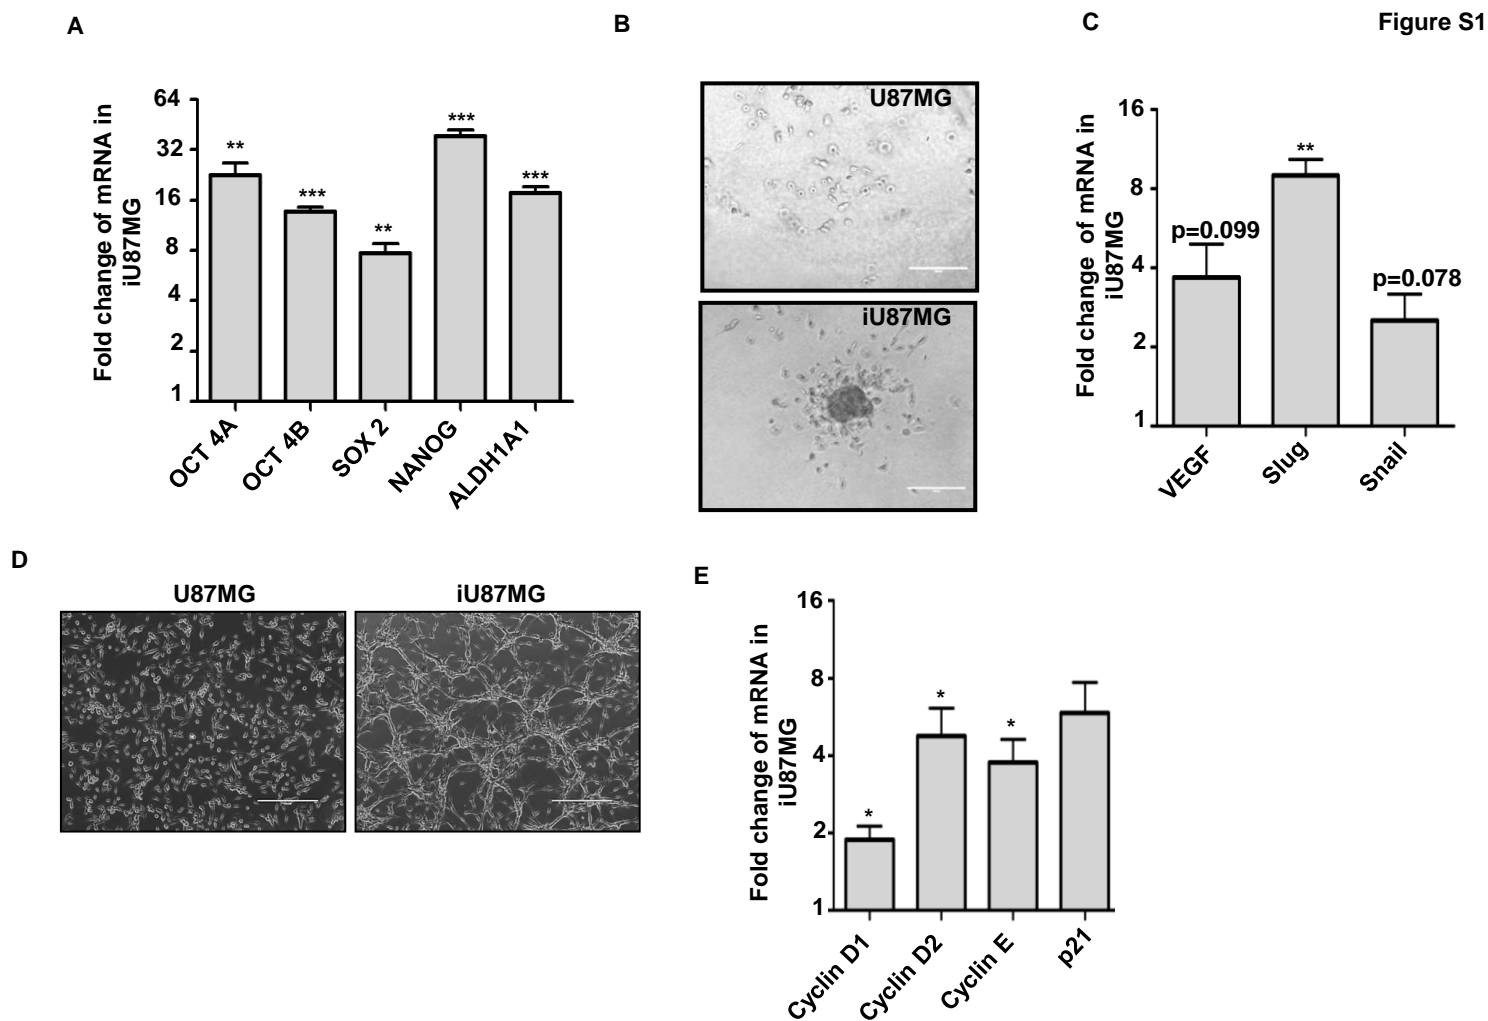

**Figure S1. Phenotypic characteristics of iU87MG cells (related to Figure 2)**

A. Expression of pluripotent stem cell markers and ALDH1A at mRNA level in iU87MG compared to U87MG as assessed by real-time qPCR. Values are normalized against 18S rRNA expression.

B. Representative image of a 3D-sphere formed by iU87MG in a matrigel-coated plate after 72 hrs.

C. Fold changes in the mRNA level of Slug, Snail and VEGF in iU87MG over U87MG as assessed by real-time qPCR. Values are normalized against 18S rRNA.

D. iU87MG showed higher connective tube formation after 72hrs on top of a matrigel coated plate.

E. Accumulation of Cyclin D1, Cyclin D2, Cyclin E and p21 at mRNA level in iU87MG over U87MG as assessed by real-time qPCR. Values are normalized against 18S rRNA expression.

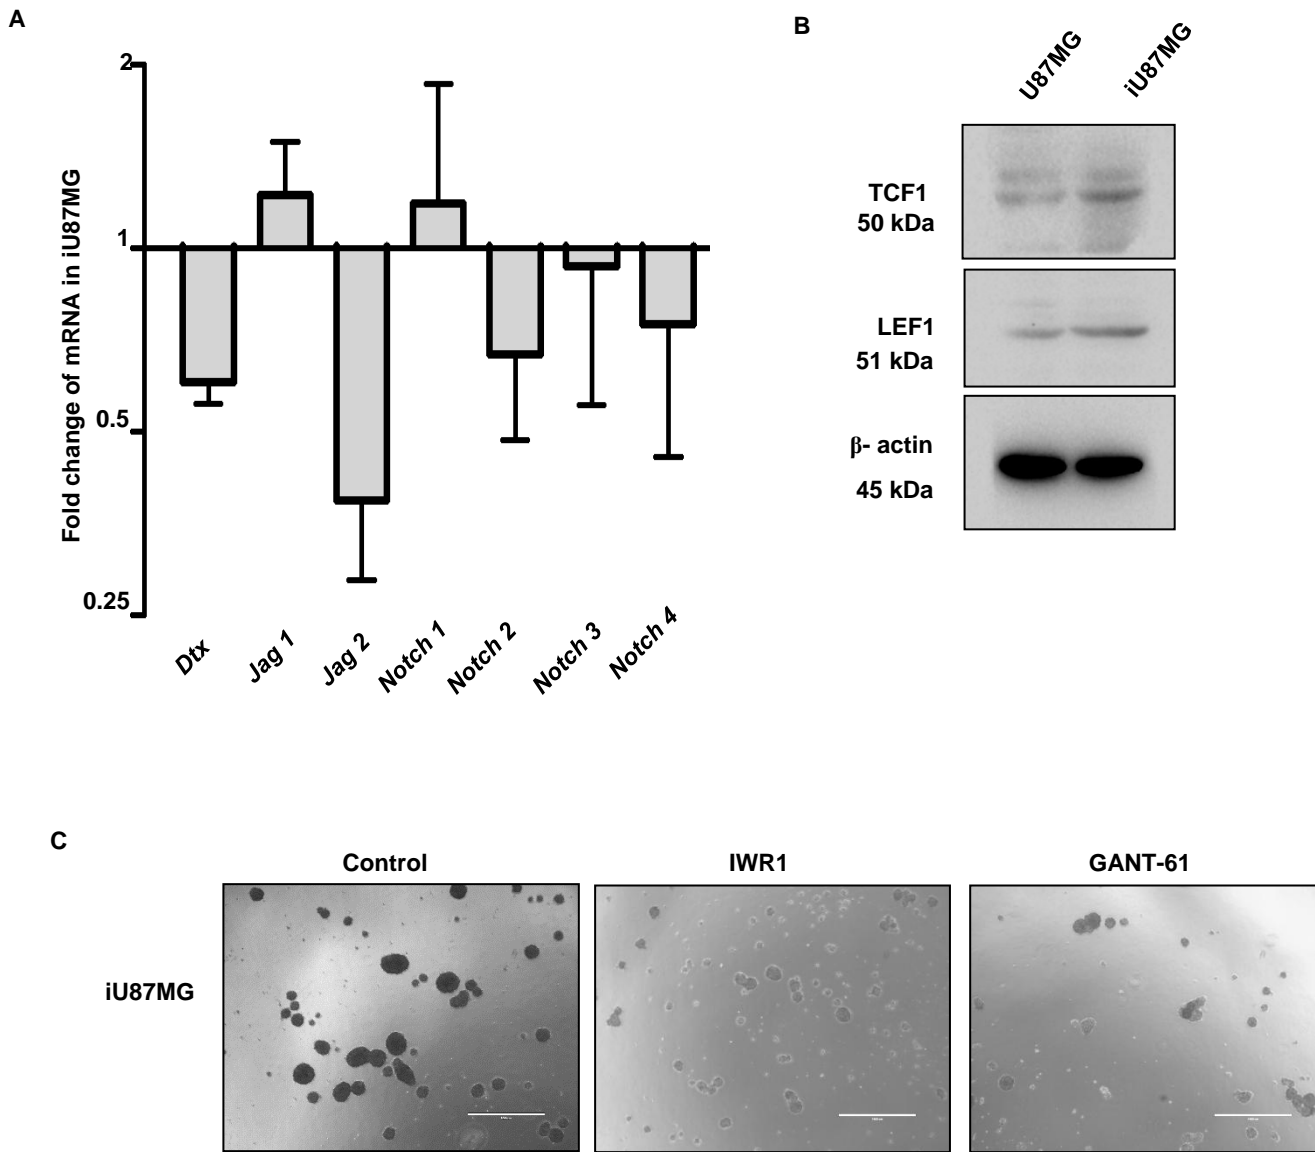

**Figure S2. Involvement of stem cells regulatory pathways in NS-induced cells (related to Figure 4)**

A. mRNA expression of Notch pathway genes showed down regulation in iU87MG compared to U87MG.

B. Western blots of target genes of  $\beta$ -catenin and Gli1 showed enhancement upon nutritional stress.

C. Phase contrast images showed neurospheres formation ability of pre-treated iU87MG with Wnt/ $\beta$ -catenin and Sonic Hedgehog pathway inhibitors (IWR1 and GANT61 respectively).

**Supplementary Table S1: List of primers details**

| <b>NAME</b>       | <b>FORWARD PRIMER</b> | <b>REVERSE PRIMER</b> |
|-------------------|-----------------------|-----------------------|
| OCT 4A            | GAGGAGTCCCAGGACATCAA  | ACACTCGGACCACATCCTTC  |
| OCT 4B            | GAAGTTAGGTGGGCAGCTTG  | CTCCAGGTTGCCTCTCACTC  |
| SOX 2             | AGAACCCCAAGATGCACAAC  | ATGTAGGTCTGCGAGCTGGT  |
| NANOG             | ACCAGACCCAGAACATCCAG  | CTCGTCGATTAGGCTCCAAC  |
| ALDH 1A           | TGGAGTCAATGAATGGTGGGA | CAAGTCGGCATCAGCTAACA  |
| CYCLIN D1         | CCTAAGTTCGGTTCGATGA   | ACGTCAGCCTCCACACTCTT  |
| CYCLIN D2         | ATTGGCATGTCTGGTTCACA  | GCCAGATACCAGAAGCGAAG  |
| CYCLIN E          | AGCGGTAAGAAGCAGAGCAG  | TTTGATGCCATCCACAGAAA  |
| P21               | ATGAAATTCACCCCCTTTCC  | CCCTAGGTCGTGCTCACTTC  |
| VEGFA             | AGGCCAGCACATAGGAGAGA  | TTTCTTGCGCTTTCGTTTTT  |
| SNAIL             | GAGGACAGTGGGAAAGGCTC  | TGGCTTCGGATGTGCATCTT  |
| SLUG              | CATCTTTGGGGCGAGTGAGT  | GGCCAGCCCAGAAAAAGTTG  |
| WNT 2             | GTGGATGCAAAGGAAAGGAA  | AGCCAGCATGTCCTGAGAGT  |
| FRIZZLED 7        | GTACTIONAAGGAGGAGGAGA | GTAGGTGAGAACGGTAAAGA  |
| DISHEVELED 2      | TGAGAGCTACCTAGTCAACC  | GGGTATTGGTAGGAGAAAGT  |
| DISHEVELED 3      | GAGACCAAGATCATCTACCA  | CGTCCATAGACTTGAAGAAG  |
| AXIN 1            | AGAGCCATCTACCGAAAGTA  | ACTTAAGGAAGGAGGGATAG  |
| AXIN 2            | CATAGGTTCTGGCTATGTCT  | TCTCTGGAGCTGTTTCTTAC  |
| LRP 6             | TTGTGACAGTGACTATGCTC  | TCTCTGTGTATGGAGAAGGT  |
| $\beta$ - CATENIN | TCCTTCTCTGAGTGGTAAAG  | CATCTAATGTCTCAGGGAAC  |
| GLI1              | GTGCAAGTCAAGCCAGAACA  | ATAGGGGCCTGACTGGAGAT  |
| GLI2              | TTTATGGGCATCCTCTCTGG  | AAGGCTGGAAAGCACTGTGT  |
| PTCH1             | TCCCAGCGCTTTCTACATCT  | CTTTGTCGTGGACCCATTCT  |
| SHH               | TACTCGCAGCTGCTCTACCA  | TGTCTTTTTGCTTTGCGTTG  |
| SMO               | CAACCTGTTTGCCATGTTTG  | TTTGGCTCATCGTCACTCTG  |
| JAGGED 1          | GAGATGACTTCTTTGGACAC  | TGCACTTATCACAGTACAGG  |
| JAGGED 2          | CTGCGACGAGAACTACTACA  | CTTGTTTACACACAGCTTCC  |
| NOTCH 1           | AGTACTGTACCGAGGATGTG  | GCACAGTCATCAATGTTCTC  |
| NOTCH 2           | ACTGCCAGTACTCAACATCT  | GGTACAGGTACTIONCCATTG |
| NOTCH 3           | AGAGCTGCAGTCAGAATATC  | GTGTCACAGATAGCATCCTC  |
| NOTCH 4           | TAGTGAGGAGATGACAGCTT  | ACAGTAGTCAGTGCTGGTTT  |
| C-MYC             | GTCAGAGTCTGGATCACCTT  | ACTCTGACACTGTCCAATT   |
| MMP-2             | GGACACACTAAAGAAGATGC  | CCTGTATGTGATCTGGTTCT  |
| MMP-7             | CTTTGGCCTACCTATAACTG  | ATGATACGATCCTGTAGGTG  |
| $\alpha$ -CATENIN | GCTGTCTCAGAGAATCACAT  | TCCATCTCTGAGGTGACTAC  |
| TCF4              | AGAGCTGAGTGATTTACTGG  | CCTGAGCTACTTCTGTCTTC  |
| LEF1              | AGCTCCTGATATCCCTACTT  | GTTACAATAGCTGGATGAGG  |

Full scanned images of blots of Nestin Figure 2A

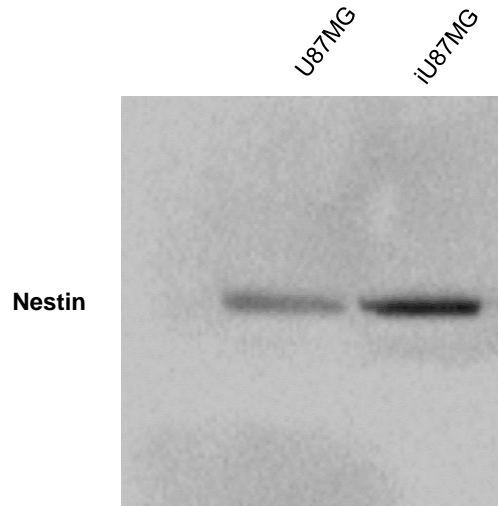

Supplement: 41420_2018_126_MOESM1_ESM.pdf [file 41420_2018_126_MOESM1_ESM.pdf]
